# Supplementary material for: Aqueous Molecular Dynamics Simulations of the M. tuberculosis Enoyl-ACP Reductase-NADH System and Its Complex with a Substrate Mimic or Diphenyl Ethers Inhibitors
Source: Int J Mol Sci. 2015 Oct 7;16(10):23695–722. doi: 10.3390/ijms161023695 (PMC4632722; doi:10.3390/ijms161023695)
Supplement: Supplementary file 1 [file ijms-16-23695-s001.xlsx]

## Sheet: Simple correlation analysis
Aqueous Molecular Dynamics Simulations of the M. Tuberculosis Enoyl-ACP Reductase-NADH System and its Complex with a Substrate Mimic or Diphenyl Ethers Inhibitors
Camilo Henrique da Silva Lima; Ricardo Bicca de Alencastro; Carlos Roland Kaiser; Marcus Vinícius Nora de Souza; Carlos Rangel Rodrigues; Magaly Girão Albuquerque
Table S1. Inhibitors pKi value, steric (LJ), electrostatic (C) and total energies for NADH and binding site residues.
Table S1	NADHC	NADHLJ	Ile95LJ	Gly96C	Gly96LJ	Phe97C	Phe97LJ	Met98C	Met98LJ	Pro99LJ	Gln100C	Gln100LJ	Met103C	Met103LJ	Phe149C	Phe149LJ	Arg153LJ	Ala154C	Ala154LJ	Met155C	Met155LJ	Pro156C	Pro156LJ	Ala157C	Ala157LJ	Tyr158C	Tyr158LJ	Met161C	Met161LJ	Ala164LJ	Lys165C	Lys165LJ	Ala198C	Ala198LJ	Met199C	Met199LJ	Ala201LJ	Ile202C	Ile202LJ	Val203C	Val203LJ	Leu207LJ	Gln214LJ	Ile215LJ	Leu218LJ	NADH	Gly96	Phe97	Met98
NADHC	1
NADHLJ	-0.364265	1
Ile95LJ	-0.349639	0.686287	1
Gly96C	-0.0107297	0.0950492	-0.245014	1
Gly96LJ	-0.314075	0.505384	0.563829	0.178334	1
Phe97C	-0.139428	-0.276816	0.215991	0.30681	0.422153	1
Phe97LJ	-0.691802	0.129554	0.114178	0.574859	0.417453	0.52592	1
Met98C	-0.357683	-0.224018	0.0559588	-0.179145	0.557822	0.487407	0.423921	1
Met98LJ	-0.640706	0.2505	0.0831023	0.0152162	-0.255952	-0.22336	0.491074	-0.123169	1
Pro99LJ	-0.69252	-0.155437	-0.0615931	0.381278	0.143416	0.474547	0.926268	0.45455	0.589431	1
Gln100C	-0.263147	0.0583853	-0.266067	0.180148	-0.594159	-0.314284	0.124622	-0.587264	0.715978	0.225627	1
Gln100LJ	-0.406353	0.0282398	-0.291753	0.663227	-0.258508	0.135178	0.60268	-0.287504	0.602829	0.596631	0.783795	1
Met103C	0.357407	-0.335682	-0.276039	0.639416	0.166886	0.497285	0.415384	0.201537	-0.187814	0.345331	-0.280019	0.152928	1
Met103LJ	-0.395336	0.40134	0.651928	0.139983	0.6148	0.280416	0.467687	0.263163	0.038438	0.334408	-0.454507	-0.200768	0.18184	1
Phe149C	0.814394	-0.392701	-0.55658	-0.0686437	-0.580515	-0.371827	-0.598513	-0.306274	-0.289981	-0.515141	-0.0390347	-0.20255	0.259407	-0.597495	1
Phe149LJ	0.0544996	0.503937	0.358591	-0.577824	0.0902622	-0.544937	-0.668209	-0.224828	-0.234214	-0.752305	-0.0994965	-0.49749	-0.806487	-0.157008	0.00620912	1
Arg153LJ	0.912526	-0.44693	-0.328131	-0.10323	-0.418932	-0.0488398	-0.772704	-0.411367	-0.702592	-0.73066	-0.173564	-0.349329	0.119675	-0.497603	0.703351	0.172677	1
Ala154C	0.194713	-0.21685	-0.405753	0.203162	0.061843	0.259174	0.0302451	0.175735	-0.146015	-0.0192704	0.168254	0.265862	0.19596	-0.687113	0.197096	-0.0897565	0.205342	1
Ala154LJ	-0.373174	0.630816	0.872528	-0.390017	0.382609	-0.0872603	-0.0853323	-0.0611491	0.0351547	-0.187371	-0.242645	-0.394588	-0.540755	0.662282	-0.548876	0.545945	-0.286177	-0.6844	1
Met155C	0.0946224	-0.0187889	0.0288726	-0.0855788	-0.136989	-0.387817	-0.126398	-0.168283	-0.0188103	-0.0499787	-0.236872	-0.331029	0.0564029	0.547874	0.0545739	-0.0546403	-0.0280529	-0.867218	0.350224	1
Met155LJ	-0.843672	0.309267	0.425717	-0.312034	0.240492	-0.0764593	0.389043	0.25897	0.547915	0.461902	0.162485	0.0585255	-0.509659	0.499083	-0.809905	0.124147	-0.777916	-0.456658	0.587364	0.246179	1
Pro156C	-0.294325	-0.0465263	-0.193967	0.144001	-0.599548	-0.214604	0.287379	-0.450123	0.85926	0.446331	0.893266	0.718858	-0.0544512	-0.211848	-0.0378224	-0.373306	-0.30302	-0.0550701	-0.214232	-0.00170238	0.251957	1
Pro156LJ	-0.333646	-0.337085	-0.019216	-0.000559162	-0.00381243	0.343292	0.598382	0.437901	0.526007	0.770088	0.0542548	0.176086	0.434852	0.326305	-0.233536	-0.732656	-0.492456	-0.143118	-0.16666	0.184096	0.374945	0.444956	1
Ala157C	-0.191826	-0.559571	-0.0599784	-0.328151	0.0416095	0.472079	0.332439	0.714947	0.186268	0.550434	-0.22381	-0.14746	0.292921	0.0961072	-0.117374	-0.515271	-0.250614	0.0920209	-0.215825	-0.0642803	0.238815	0.0826136	0.831817	1
Ala157LJ	-0.468051	-0.181831	-0.219667	0.0624007	-0.0327744	-0.0891878	0.447652	0.170967	0.484302	0.602711	0.293481	0.270762	0.0300754	0.261762	-0.467985	-0.398179	-0.542748	-0.220072	-0.0619382	0.379867	0.662079	0.454696	0.632134	0.370848	1
Tyr158C	-0.0174275	0.537896	0.668817	-0.46208	0.256121	-0.0453204	-0.381253	-0.0318869	-0.186613	-0.524314	-0.249887	-0.413626	-0.524956	0.0122306	-0.0261347	0.737841	0.102935	-0.0362716	0.58672	-0.314755	-0.0298149	-0.399108	-0.534983	-0.280918	-0.74859	1
Tyr158LJ	0.587953	-0.823809	-0.498323	-0.0530984	-0.23702	0.251305	-0.248328	0.126553	-0.472783	-0.0690384	-0.265012	-0.284009	0.465444	-0.17545	0.326096	-0.411718	0.561194	0.15249	-0.467952	0.194679	-0.337266	-0.144596	0.285975	0.439781	0.243888	-0.564959	1
Met161C	0.193909	0.327637	-0.107454	-0.118667	0.177318	-0.483941	-0.275627	0.161708	-0.180943	-0.406382	-0.309671	-0.331479	-0.0825116	-0.219242	0.462224	0.447073	0.0190882	0.181795	-0.102124	-0.082973	-0.318692	-0.422046	-0.41904	-0.273142	-0.453185	0.381519	-0.372242	1
Met161LJ	-0.519506	0.290966	0.106647	-0.405926	-0.335415	-0.430795	0.0358418	-0.105591	0.774381	0.149308	0.618463	0.304532	-0.625299	-0.313112	-0.0881841	0.298249	-0.459641	0.0195064	0.123436	-0.268087	0.427456	0.579591	0.0867259	0.0447397	0.0739759	0.296535	-0.625135	0.173547	1
Ala164LJ	-0.179187	0.428357	0.0614614	-0.296645	0.0490647	-0.505943	-0.153241	0.148989	0.186621	-0.214502	-0.0402836	-0.14652	-0.398936	-0.216235	0.244395	0.515466	-0.248882	0.0624254	0.0887352	-0.171813	0.00294964	-0.14297	-0.316541	-0.194518	-0.383461	0.532324	-0.667316	0.867036	0.597027	1
Lys165C	-0.446437	0.720655	0.613933	-0.279222	0.306007	-0.211568	-0.101141	-0.216076	0.204983	-0.238415	0.257388	-2.87629e-05	-0.759211	0.0855459	-0.577208	0.710365	-0.298639	-0.0241746	0.65017	-0.270254	0.518379	0.0151738	-0.409694	-0.413091	-0.0456999	0.576355	-0.611217	-0.0224509	0.441681	0.210318	1
Lys165LJ	-0.376702	0.575976	0.143629	-0.227415	-0.144256	-0.590462	-0.0796957	-0.201238	0.524753	-0.122798	0.431447	0.203583	-0.612612	-0.271659	0.0420977	0.531704	-0.364081	0.0176481	0.189168	-0.235716	0.208244	0.276627	-0.312699	-0.360519	-0.221431	0.49223	-0.838724	0.556423	0.852233	0.850867	0.500927	1
Ala198C	0.580984	-0.456034	-0.467966	0.64495	-0.111529	0.418934	0.120929	-0.0406797	-0.390707	0.0663016	-0.175116	0.208214	0.856812	-0.169595	0.532385	-0.634787	0.479731	0.332836	-0.67064	-0.104442	-0.81757	-0.110698	0.0448272	0.0219439	-0.308936	-0.367248	0.452072	8.9964e-06	-0.611885	-0.313113	-0.772937	-0.508221	1
Ala198LJ	0.306418	0.0233039	0.198122	0.6384	0.489802	0.650632	0.305319	0.0760292	-0.483254	0.0806199	-0.47965	-0.0119978	0.760904	0.452289	-0.0414705	-0.445897	0.206085	0.0354929	-0.0458798	0.0208382	-0.438831	-0.389227	0.0241211	-0.0652523	-0.267421	-0.0919849	0.238467	-0.172849	-0.806131	-0.476923	-0.336387	-0.639298	0.69772	1
Met199C	0.875248	-0.211238	-0.240113	0.0406586	-0.435701	-0.339554	-0.650053	-0.619894	-0.437472	-0.636773	-0.109477	-0.316352	0.260469	-0.145439	0.69879	0.0484231	0.781715	-0.227026	-0.127076	0.474274	-0.618885	-0.0740336	-0.283106	-0.360403	-0.268197	-0.118416	0.469874	0.0317763	-0.466672	-0.269608	-0.377904	-0.330042	0.432626	0.255159	1
Met199LJ	0.358332	-0.446649	-0.0212001	0.0842929	-0.114403	0.36379	-0.0442666	0.112437	-0.427335	0.0218335	-0.535546	-0.294387	0.475797	0.349709	0.298164	-0.390465	0.366513	-0.460639	0.0227554	0.480028	-0.335059	-0.296362	0.160885	0.209942	-0.238855	-0.0941608	0.402661	-0.165917	-0.56537	-0.297942	-0.684274	-0.554021	0.543931	0.518546	0.434424	1
Ala201LJ	0.166671	-0.081533	-0.0694471	0.759642	0.19183	0.601608	0.553647	0.030925	0.0256767	0.411933	0.00334028	0.45266	0.872758	0.120363	0.0903415	-0.750477	0.00325421	0.33207	-0.453729	-0.262136	-0.470445	0.144152	0.335996	0.13376	-0.120713	-0.309752	0.139769	-0.177572	-0.388786	-0.350518	-0.464604	-0.379715	0.786401	0.763023	0.0673436	0.256287	1
Ile202C	-0.654617	0.238771	0.190718	-0.395889	-0.012914	-0.38827	0.015301	0.038789	0.31671	0.117184	0.184466	-0.0310698	-0.767491	0.246503	-0.560525	0.424069	-0.485631	-0.506012	0.560834	0.341593	0.837896	0.113646	-0.057556	-0.100254	0.482213	0.0562496	-0.348155	-0.123868	0.422454	0.168262	0.529291	0.348083	-0.835973	-0.631293	-0.402403	-0.289243	-0.791436	1
Ile202LJ	0.36339	-0.749337	-0.588268	0.246508	-0.344708	0.467128	0.120006	0.108459	-0.0557145	0.263009	0.191975	0.32549	0.576358	-0.531505	0.363857	-0.657896	0.359106	0.64904	-0.833091	-0.448272	-0.510004	0.251347	0.370734	0.481616	0.0338938	-0.481935	0.634992	-0.314543	-0.200532	-0.433278	-0.589653	-0.462812	0.656628	0.203133	0.0948225	0.126697	0.56568	-0.654712	1
Val203C	-0.365332	0.295892	-0.0453076	-0.0199175	0.0474937	-0.100732	0.0130644	0.0176541	0.143879	-0.063175	0.367949	0.348461	-0.538564	-0.509925	-0.152521	0.445012	-0.172086	0.548591	-0.0802969	-0.740278	0.0510761	0.00776026	-0.503988	-0.319645	-0.293084	0.422847	-0.585457	0.329934	0.545898	0.541759	0.543323	0.669442	-0.293566	-0.417715	-0.565155	-0.642308	-0.238368	0.222725	-0.0889024	1
Val203LJ	0.00761302	0.227862	0.0222593	-0.430574	0.381158	-0.384443	-0.248714	0.501293	-0.226284	-0.308797	-0.517585	-0.603536	-0.226084	-0.030282	0.156333	0.508619	-0.142594	0.092248	0.08947	0.0126538	0.048151	-0.572459	-0.207013	0.0531675	-0.151074	0.333704	-0.18788	0.83957	0.131018	0.730971	0.0928278	0.367297	-0.310372	-0.299129	-0.17942	-0.222996	-0.439904	0.154968	-0.392945	0.21773	1
Leu207LJ	0.935357	-0.31804	-0.237096	-0.0316473	-0.0885227	0.0282731	-0.661048	-0.234777	-0.764884	-0.707443	-0.344137	-0.460295	0.30059	-0.369719	0.603521	0.138216	0.894337	0.352401	-0.306404	-0.0847427	-0.766601	-0.446942	-0.393188	-0.165981	-0.453939	0.0529168	0.62418	0.109863	-0.608513	-0.285115	-0.259362	-0.477873	0.495122	0.373537	0.726259	0.214522	0.147327	-0.626581	0.374239	-0.252916	0.0341558	1
Gln214LJ	-0.283593	0.100823	-0.111212	-0.467074	0.271997	-0.409586	-0.0805954	0.562773	0.0208326	-0.0374437	-0.272517	-0.398982	-0.374862	-0.0536499	-0.0869583	0.404116	-0.371296	0.0702812	0.0504472	0.040323	0.37758	-0.325128	-0.00939309	0.200353	0.248544	0.0743331	-0.142704	0.596131	0.293916	0.603943	0.163393	0.365735	-0.522104	-0.552712	-0.409972	-0.398016	-0.594471	0.465398	-0.350721	0.282683	0.886838	-0.233227	1
Ile215LJ	-0.0975552	0.192482	-0.0624338	-0.069628	0.455862	-0.284711	-0.0268394	0.232336	-0.156128	-0.0997559	-0.193138	-0.280629	-0.133001	0.148534	-0.321835	0.265019	-0.224203	0.0885997	0.0805186	0.169368	0.352423	-0.292097	-0.0547211	-0.0594242	0.515326	-0.257189	0.15762	0.161973	-0.1983	-0.0416464	0.291166	-0.116041	-0.379472	-0.133149	-0.116744	-0.5012	-0.338696	0.345903	-0.279564	-0.0117476	0.486135	0.0808723	0.63074	1
Leu218LJ	0.216056	0.229439	0.253949	-0.557853	0.219957	-0.376954	-0.541519	-0.0561443	-0.235122	-0.566031	-0.188983	-0.618552	-0.404217	-0.0135328	-0.0912475	0.619912	0.159707	0.0088967	0.346607	0.102755	0.212387	-0.280351	-0.208396	-0.0740878	0.125036	0.219956	0.181788	0.101901	-0.034955	-0.0235928	0.498146	-0.0305694	-0.540761	-0.262701	0.181601	-0.445891	-0.528143	0.225942	-0.303448	-0.0799533	0.41292	0.386898	0.41105	0.703037	1
NADH	0.909836	0.0550357	-0.0690679	0.0308482	-0.111545	-0.272831	-0.683986	-0.483306	-0.575313	-0.811742	-0.256116	-0.423086	0.233619	-0.245028	0.698168	0.282976	0.779218	0.112136	-0.119018	0.093077	-0.766736	-0.336291	-0.507915	-0.455	-0.582839	0.220991	0.263299	0.353887	-0.427337	-0.00124722	-0.157536	-0.147236	0.4197	0.338909	0.84427	0.185166	0.142366	-0.595454	0.0557173	-0.259846	0.109693	0.861127	-0.259128	-0.0188271	0.333877	1
Gly96	-0.128515	0.273675	0.00348448	0.92754	0.533146	0.424136	0.652821	0.0578379	-0.084131	0.382296	-0.0707765	0.472062	0.613159	0.353867	-0.279507	-0.462534	-0.247873	0.198169	-0.190019	-0.125611	-0.176947	-0.103903	-0.00192878	-0.266342	0.0412044	-0.300021	-0.135678	-0.0346825	-0.476413	-0.236422	-0.123851	-0.250323	0.512172	0.734933	-0.130526	0.0290239	0.726004	-0.345293	0.0810247	0.000913573	-0.225442	-0.0608327	-0.298285	0.113276	-0.396103	-0.0158426	1
Phe97	-0.599476	0.0197128	0.1579	0.55648	0.465013	0.72887	0.965647	0.490156	0.327057	0.8906	0.00429563	0.526438	0.486302	0.462146	-0.595385	-0.704376	-0.636923	0.10353	-0.0953497	-0.220232	0.289807	0.165764	0.586561	0.411833	0.333096	-0.320743	-0.123117	-0.369725	-0.102766	-0.277931	-0.146053	-0.244552	0.225338	0.444554	-0.627012	0.0755128	0.629472	-0.106308	0.239319	-0.0202595	-0.317663	-0.523484	-0.190014	-0.10859	-0.551072	-0.633942	0.655083	1
Met98	-0.738619	0.185602	0.0985146	-0.0356668	-0.0963688	-0.0839227	0.60859	0.161073	0.959588	0.715094	0.545522	0.517996	-0.129635	0.112852	-0.375239	-0.296683	-0.815388	-0.0953812	0.017622	-0.0664265	0.618345	0.726907	0.647296	0.387981	0.530127	-0.194632	-0.434303	-0.134095	0.740191	0.227846	0.142587	0.464811	-0.400099	-0.459044	-0.610854	-0.393108	0.0343052	0.325972	-0.0246535	0.148096	-0.0828924	-0.827264	0.180302	-0.0893889	-0.249753	-0.709206	-0.0672686	0.464255	1
Pro99	-0.679057	-0.261478	-0.0927247	0.209807	0.0963798	0.45818	0.847563	0.537047	0.583454	0.978307	0.200539	0.495583	0.278676	0.266615	-0.495243	-0.715506	-0.705063	0.00956408	-0.203151	-0.0639941	0.507955	0.435836	0.830992	0.686225	0.649851	-0.522785	0.0256942	-0.419251	0.19842	-0.211155	-0.244281	-0.142461	-0.0138944	-0.0376572	-0.661427	-0.00311721	0.302321	0.160087	0.312476	-0.0734701	-0.240663	-0.679655	0.0639127	-0.0557709	-0.464752	-0.844557	0.217	0.822244	0.732543
Gln100	-0.383467	0.0383524	-0.297834	0.553099	-0.368503	0.0102873	0.4912	-0.388374	0.663908	0.516115	0.883374	0.983436	0.0336832	-0.284169	-0.164252	-0.404482	-0.314287	0.249747	-0.368605	-0.318954	0.0915912	0.803216	0.148723	-0.176606	0.289994	-0.385086	-0.291682	-0.340541	0.41033	-0.122332	0.0751007	0.279563	0.106023	-0.149047	-0.270695	-0.378473	0.342586	0.0303913	0.301669	0.370366	-0.606538	-0.447814	-0.38064	-0.268154	-0.521963	-0.394044	0.335596	0.398543	0.550137
Met103	-0.315124	0.324617	0.573977	0.244374	0.615351	0.353683	0.518111	0.285955	0.00410305	0.378839	-0.482071	-0.164987	0.346812	0.985362	-0.52494	-0.289577	-0.453885	-0.621422	0.53796	0.532361	0.387686	-0.211508	0.38663	0.142453	0.254892	-0.0793434	-0.0866583	-0.223426	-0.407063	-0.275415	-0.0500243	-0.365324	-0.0132242	0.563325	-0.0935689	0.416052	0.266113	0.102067	-0.407048	-0.579754	-0.0680794	-0.30054	-0.116162	0.11862	-0.0829855	-0.193216	0.443832	0.52512	0.0851678
Phe149	0.310042	0.352259	0.162702	-0.568599	-0.0988221	-0.6337	-0.8223	-0.309965	-0.313676	-0.875423	-0.106545	-0.535074	-0.680876	-0.338211	0.32325	0.948303	0.386635	-0.0223865	0.342447	-0.0343876	-0.139558	-0.365276	-0.767454	-0.524869	-0.525335	0.689948	-0.286128	0.569777	0.254255	0.565366	0.489051	0.51653	-0.431755	-0.435128	0.267602	-0.27488	-0.681528	0.223414	-0.507109	0.372723	0.530938	0.32234	0.35483	0.148654	0.557683	0.48937	-0.526419	-0.855533	-0.399852
Arg153	0.907155	-0.439113	-0.308861	-0.113976	-0.414519	-0.0444333	-0.777078	-0.413734	-0.704467	-0.735668	-0.177901	-0.357557	0.107658	-0.486944	0.692429	0.183147	0.999722	0.193157	-0.26558	-0.02513	-0.768249	-0.307101	-0.496203	-0.252344	-0.548058	0.117879	0.555177	0.010432	-0.457956	-0.252126	-0.285351	-0.364004	0.46778	0.20644	0.779916	0.370531	-0.00519824	-0.476588	0.347205	-0.173383	-0.147081	0.891317	-0.3768	-0.229284	0.165248	0.776942	-0.255437	-0.639097	-0.817925
Ala154	-0.382028	0.685401	0.910696	-0.399389	0.483939	-0.013954	-0.0923947	-0.0118547	-0.00905585	-0.233108	-0.233708	-0.382789	-0.583994	0.557489	-0.593401	0.627733	-0.273201	-0.473813	0.966348	0.117039	0.54831	-0.278182	-0.251788	-0.22821	-0.152454	0.695852	-0.511399	-0.0592074	0.15597	0.1292	0.776755	0.234707	-0.692579	-0.0428918	-0.233583	-0.135036	-0.43086	0.498854	-0.777228	0.0965672	0.14061	-0.245747	0.085727	0.128511	0.421776	-0.104188	-0.159591	-0.0786379	-0.0123678
Met155	-0.721309	0.269042	0.386289	-0.301895	0.173569	-0.18082	0.308513	0.180857	0.480867	0.395441	0.0752366	-0.0444641	-0.435961	0.60257	-0.703	0.0942825	-0.698671	-0.657922	0.623365	0.509768	0.959329	0.223149	0.386431	0.193257	0.698318	-0.118138	-0.242666	-0.307047	0.301342	-0.0474228	0.381416	0.11619	-0.756118	-0.38345	-0.411207	-0.157599	-0.493929	0.843231	-0.583255	-0.170271	0.0464257	-0.705139	0.346895	0.36215	0.218448	-0.653468	-0.193648	0.193098	0.529515
Pro156	-0.368095	-0.282973	-0.0839486	0.0506034	-0.215542	0.195315	0.574918	0.186621	0.720423	0.767005	0.359536	0.394025	0.324468	0.182863	-0.198028	-0.711527	-0.496723	-0.132662	-0.207693	0.144933	0.385725	0.706238	0.948273	0.686874	0.660911	-0.564404	0.17482	-0.480877	0.274014	-0.30092	-0.318503	-0.149144	-0.0038023	-0.118904	-0.250052	0.022132	0.316719	-0.00521537	0.38218	-0.395674	-0.366578	-0.469264	-0.122677	-0.146802	-0.264125	-0.520739	-0.0383564	0.522463	0.769391
Ala157	-0.44242	-0.364134	-0.195727	-0.0812235	-0.0091625	0.117304	0.482186	0.417216	0.452938	0.689972	0.141022	0.153501	0.139649	0.242999	-0.412857	-0.515929	-0.524193	-0.135795	-0.134032	0.271877	0.612928	0.388677	0.824537	0.686669	0.929783	-0.697336	0.36523	-0.463014	0.0756411	-0.37727	-0.199512	-0.316234	-0.233133	-0.235198	-0.352795	-0.103757	-0.0414739	0.337732	0.217431	-0.356121	-0.0971845	-0.421129	0.273972	0.379837	0.0685103	-0.636589	-0.0733165	0.423983	0.568762
Tyr158	0.500729	-0.0943326	0.34911	-0.59356	0.0927347	0.169235	-0.671081	0.0745041	-0.639915	-0.681295	-0.530515	-0.741005	-0.208127	-0.141107	0.258242	0.507533	0.619348	0.0923166	0.278948	-0.199621	-0.334315	-0.600216	-0.379121	0.0577275	-0.669061	0.681696	0.218556	0.121134	-0.203613	0.0378404	0.139656	-0.161564	-0.0334717	0.102664	0.276594	0.245682	-0.242394	-0.242187	-0.00690967	-0.019048	0.228061	0.616044	-0.0386264	-0.164402	0.421322	0.494822	-0.475124	-0.488493	-0.615278
Met161	-0.326034	0.388397	0.0350184	-0.382207	-0.185914	-0.574506	-0.101219	-0.00857629	0.536985	-0.0717116	0.350953	0.0883708	-0.541454	-0.355061	0.147178	0.450593	-0.360392	0.101436	0.0510251	-0.254593	0.193192	0.266702	-0.127978	-0.0928952	-0.154332	0.418291	-0.677999	0.61121	0.885532	0.888821	0.344372	0.947394	-0.491746	-0.729397	-0.360058	-0.532637	-0.39622	0.281078	-0.309541	0.594361	0.50135	-0.437213	0.517426	-0.0829576	0.0199784	-0.176494	-0.399237	-0.257002	0.531607
Ala164	-0.170582	0.421078	0.0571499	-0.294617	0.0514506	-0.499803	-0.154983	0.155535	0.175959	-0.216679	-0.0511663	-0.152556	-0.389464	-0.217119	0.25222	0.511214	-0.241558	0.0660597	0.0824735	-0.172483	-0.00749924	-0.152686	-0.317065	-0.19067	-0.390435	0.531982	-0.660077	0.871907	0.587435	0.999886	0.199456	0.843598	-0.302045	-0.468606	-0.265262	-0.288039	-0.344761	0.158499	-0.427223	0.537674	0.734852	-0.276861	0.603655	-0.0445575	-0.0274787	0.00473525	-0.233772	-0.277457	0.219098
Lys165	-0.480086	0.762038	0.509397	-0.296968	0.166961	-0.393442	-0.106489	-0.23998	0.362132	-0.224815	0.363092	0.0819811	-0.805153	-0.0465042	-0.407576	0.736638	-0.366298	-0.0106717	0.554393	-0.293716	0.465145	0.122584	-0.427281	-0.449042	-0.122804	0.622174	-0.787381	0.207612	0.668129	0.497413	0.937266	0.771225	-0.7732	-0.504917	-0.410886	-0.726437	-0.494661	0.529497	-0.620105	0.669259	0.21622	-0.383245	0.267491	0.16741	0.35407	-0.175173	-0.191921	-0.205926	0.292096
Ala198	0.407825	-0.116559	0.0148052	0.682843	0.345013	0.625602	0.271251	0.0466605	-0.488131	0.0817642	-0.421747	0.0521701	0.839868	0.298939	0.125067	-0.531316	0.300539	0.125579	-0.233252	-0.0147343	-0.579789	-0.332974	0.0318361	-0.0438729	-0.297476	-0.179319	0.317364	-0.133362	-0.802505	-0.460354	-0.487578	-0.643198	0.833361	0.977412	0.324507	0.560565	0.82073	-0.733716	0.35045	-0.408904	-0.322365	0.434281	-0.580487	-0.214686	-0.362228	0.385312	0.718153	0.409484	-0.472222
Met199	0.488091	-0.44346	-0.0641847	0.0838398	-0.185127	0.265279	-0.161896	-0.0145508	-0.46841	-0.0996384	-0.504762	-0.325492	0.479045	0.288938	0.400606	-0.343978	0.477953	-0.45907	-0.00324861	0.522954	-0.418985	-0.281849	0.0923951	0.122262	-0.266252	-0.10734	0.452175	-0.144064	-0.598695	-0.319943	-0.689566	-0.562818	0.572927	0.516703	0.580281	0.98564	0.244359	-0.336974	0.132336	-0.686725	-0.235269	0.330127	-0.436745	-0.47507	-0.369126	0.325707	0.00177248	-0.0492721	-0.469967
Ala201	0.136109	-0.0730871	-0.074447	0.771011	0.181246	0.594519	0.576521	0.0212476	0.0622419	0.437693	0.0404455	0.488753	0.860636	0.116653	0.07058	-0.759345	-0.0241654	0.3329	-0.456605	-0.268443	-0.446631	0.179162	0.34722	0.130716	-0.0960326	-0.324311	0.121073	-0.191924	-0.361768	-0.350403	-0.4504	-0.361066	0.771092	0.743607	0.045273	0.231983	0.999044	-0.771336	0.564769	-0.22148	-0.456636	0.115338	-0.595854	-0.338477	-0.540238	0.113363	0.731759	0.645719	0.0679256
Ile202	0.268101	-0.793816	-0.622476	0.192316	-0.391792	0.44293	0.138741	0.130805	0.00581542	0.322211	0.256643	0.360565	0.483948	-0.546323	0.289035	-0.65044	0.299916	0.622676	-0.818481	-0.431775	-0.3938	0.308284	0.405877	0.521743	0.142829	-0.531646	0.641058	-0.381814	-0.134672	-0.452446	-0.55061	-0.446775	0.559677	0.0923147	0.0197316	0.0802432	0.466705	-0.521942	0.986471	-0.0520192	-0.409815	0.286423	-0.294841	-0.240459	-0.293429	-0.0662654	0.0165472	0.247007	0.0428754
Val203	-0.0331797	0.253866	0.0165595	-0.419841	0.374972	-0.38407	-0.239786	0.488182	-0.203505	-0.306528	-0.46117	-0.546701	-0.279085	-0.0859901	0.134698	0.542738	-0.157414	0.150386	0.0778645	-0.0699218	0.0523745	-0.554387	-0.256748	0.016078	-0.179074	0.370622	-0.247236	0.850962	0.187691	0.769148	0.150364	0.430585	-0.333637	-0.336516	-0.236777	-0.287609	-0.453146	0.175039	-0.391003	0.322217	0.994111	0.00504692	0.891563	0.470215	0.391629	0.077544	-0.218563	-0.310362	-0.0639568
Leu207	0.933889	-0.322848	-0.24712	-0.0397949	-0.0985784	0.015171	-0.676572	-0.241107	-0.775398	-0.719721	-0.341503	-0.463634	0.278174	-0.379248	0.603055	0.156166	0.902782	0.34734	-0.301716	-0.0797776	-0.761913	-0.454453	-0.414493	-0.180815	-0.454036	0.0555886	0.623388	0.111558	-0.606983	-0.281102	-0.251075	-0.472378	0.483881	0.357962	0.72743	0.212736	0.121848	-0.604528	0.36271	-0.239649	0.0381088	0.999381	-0.223871	0.0869724	0.390428	0.85741	-0.0716573	-0.539983	-0.839515
Gln214	-0.273525	0.11747	-0.108213	-0.441752	0.300213	-0.416846	-0.0810855	0.542682	0.00113616	-0.0491024	-0.275086	-0.403449	-0.365924	-0.0289095	-0.115668	0.407671	-0.368242	0.0652363	0.0618472	0.0650917	0.391083	-0.334553	-0.01846	0.17343	0.287219	0.0416962	-0.117332	0.571267	0.249833	0.556448	0.184343	0.327767	-0.528588	-0.528217	-0.388351	-0.41999	-0.593731	0.475383	-0.364057	0.257535	0.875801	-0.209095	0.996295	0.694554	0.458481	-0.240917	-0.265796	-0.192627	0.155016
Ile215	-0.0981575	0.194136	-0.0623056	-0.0691411	0.455949	-0.285989	-0.0269259	0.23152	-0.155602	-0.100298	-0.192341	-0.279885	-0.134066	0.148066	-0.321765	0.266273	-0.224753	0.088768	0.0808407	0.168868	0.3524	-0.291987	-0.0562652	-0.0612432	0.514519	-0.2562	0.15558	0.163449	-0.197148	-0.0398763	0.292314	-0.113987	-0.380056	-0.133846	-0.117189	-0.502354	-0.339192	0.346503	-0.280851	-0.0100288	0.486848	0.0801164	0.631271	0.999997	0.702715	-0.0187357	0.113727	-0.109051	-0.0890971
Leu218	0.205967	0.238728	0.281884	-0.551935	0.282252	-0.336599	-0.508661	0.00531535	-0.25634	-0.544958	-0.250725	-0.649334	-0.367283	0.0313109	-0.109159	0.60272	0.135062	0.00911264	0.356955	0.102542	0.214936	-0.327072	-0.183645	-0.0400082	0.11817	0.229536	0.182857	0.12277	-0.0649349	-0.0153439	0.480863	-0.0526924	-0.526864	-0.221462	0.157387	-0.42282	-0.501611	0.205288	-0.30911	-0.0990299	0.448043	0.384045	0.432854	0.716061	0.996982	0.327199	-0.367354	-0.512294	-0.253426
pKi	0.309629	-0.236649	0.10896	-0.824349	-0.381406	-0.240981	-0.653169	-0.0402231	-0.0838776	-0.460658	-0.101841	-0.558143	-0.392267	-0.29	0.354679	0.399931	0.378307	-0.109122	0.171627	0.0429551	-0.0375594	-0.0433487	-0.0177384	0.267741	-0.242526	0.39226	0.198185	0.0621621	0.277844	0.163418	0.0510706	0.10683	-0.301848	-0.445047	0.242675	0.0892583	-0.484766	0.0508075	0.0123004	-0.103452	0.200457	0.26806	0.138597	-0.188529	0.394454	0.226522	-0.853643	-0.599404	-0.0948235
[truncated: 23 more columns]
